# Supplementary material
Source: publisher site journal article supplement (https://www.dovepress.com/article/544727)
Supplement: Supplementary file 1 [file 544727%20Revised%20%252509Supplemental%20Figure%201.docx]

**Supplemental Figure 1. Power Simulations for Logistic Regression Models**

| 1. Two continous variables |
| --- |
| 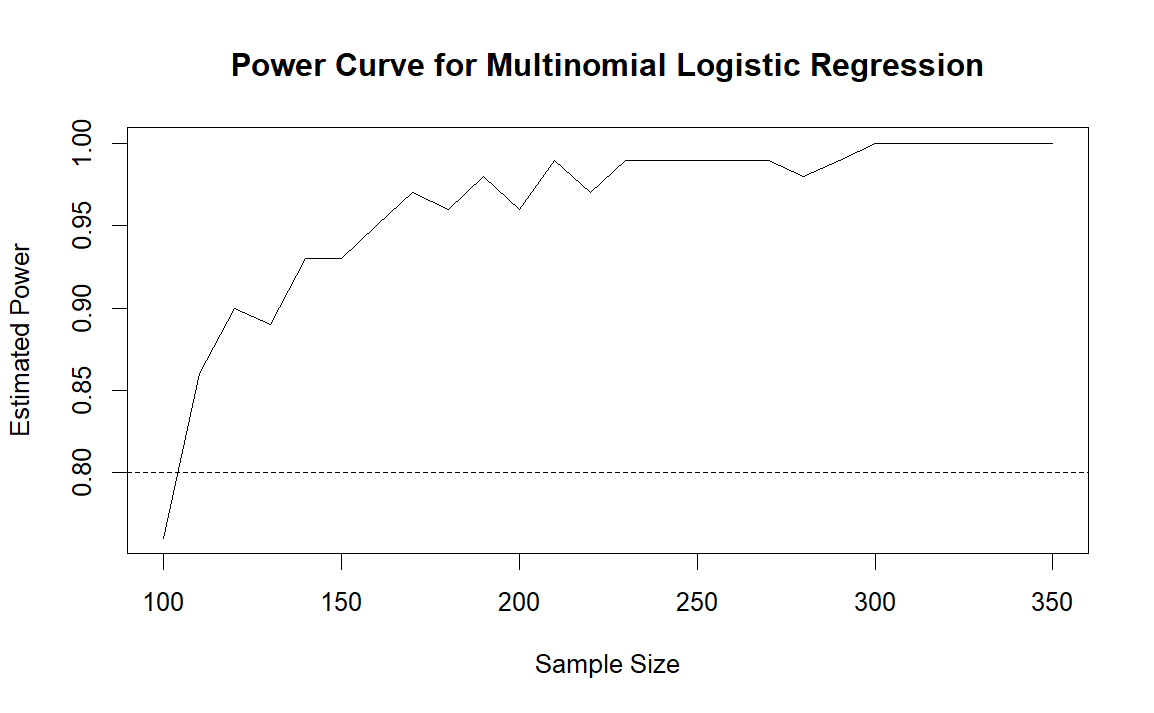 |
| 1. A continous and dichotomous variable |
| 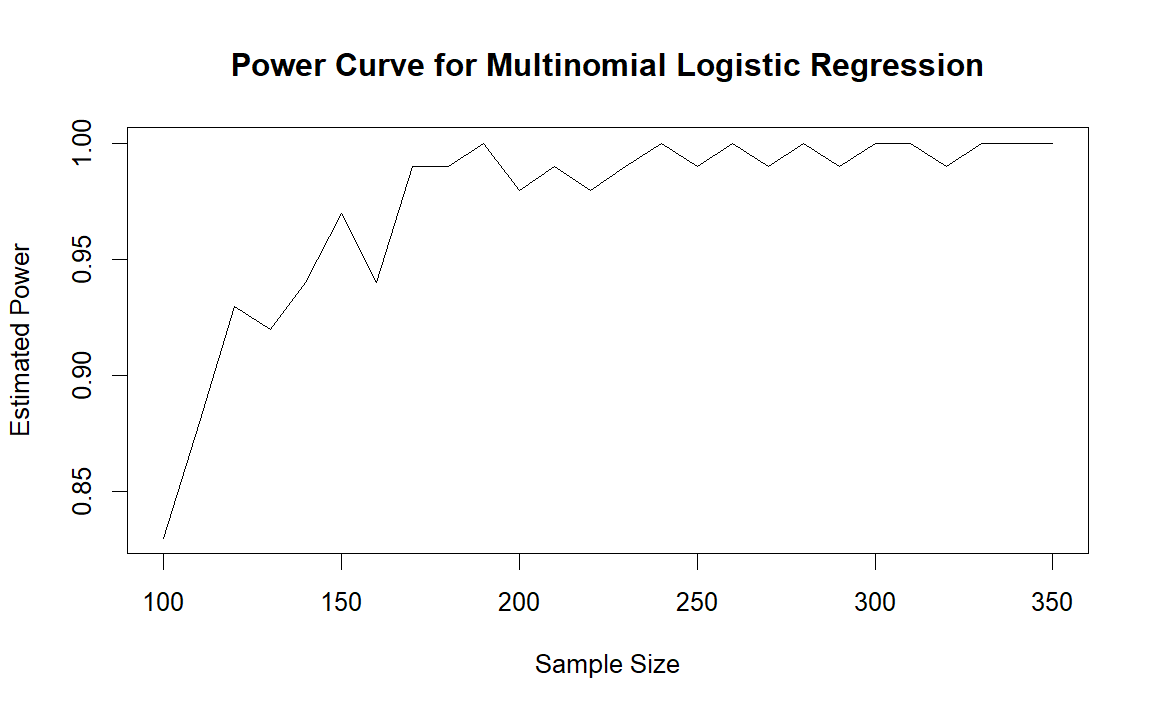 |
| 1. Two dichotomous variables |
| 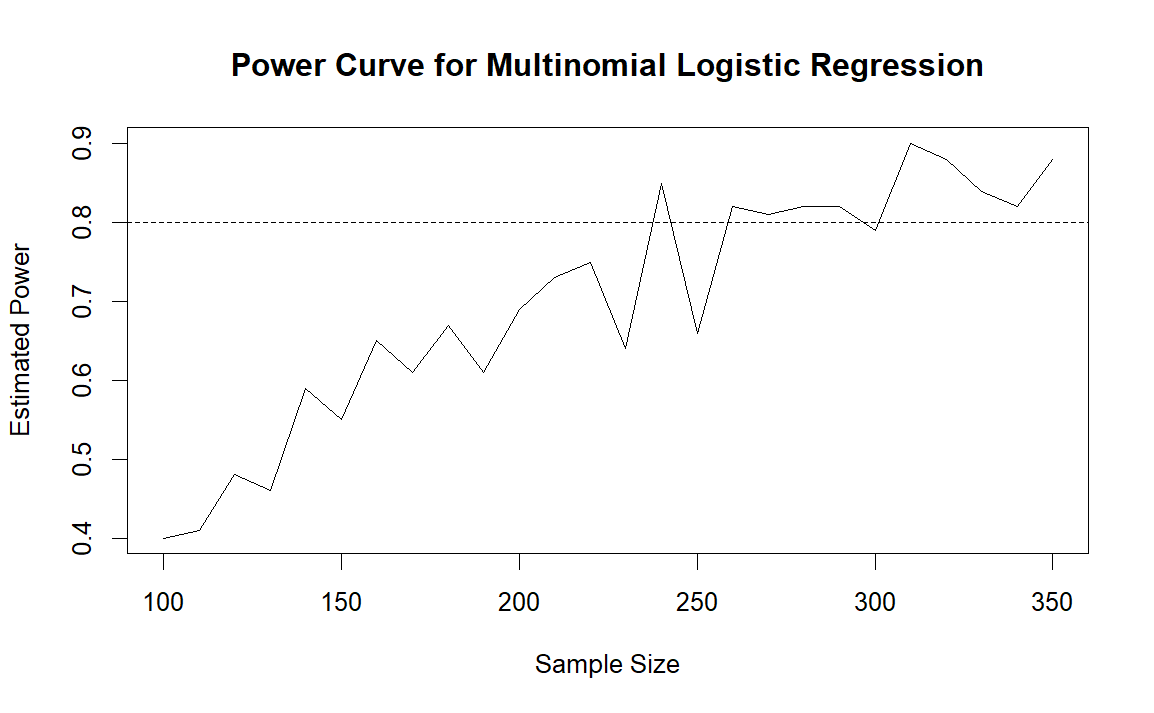 |

Simulation of power and sample size requirements for multinomial logistic regression using two variables with moderate-to-large effect sizes (odds ratios 1.5–3.0). Three predictor combinations were modeled: (**A**) two continuous variables (age and number of chronic conditions), (**B**) one continuous and one dichotomous variable (age and anticholinergic medication exposure), and (**C**) two dichotomous variables (sex and anticholinergic medication exposure).

*Note:* Simulations assumed a prevalence of 40% for mild cognitive impairment (MCI) and 10% for dementia.
